# Supplementary material for: The protective effect and mechanism of Taraxacum kok-saghyz polysaccharides against mastitis induced by intestinal flora imbalance via the “gut-milk” axis
Source: Research Square preprint supplement (doi:10.21203/rs.3.rs-8342602/v1), 2025-12-23
Supplement: Supplementary file 1 [file 74133bb0507cfb4b81659816.docx]

**Table 1 Donor cow somatic cell testing**

| Sample | Somatic cell |
| --- | --- |
| 100476 | 856*103 |
| 800548 | 899*103 |
| 800658 | 887*103 |
| 800793 | 849*103 |
| 800445 | 881*103 |
| 801007 | 864*103 |
| 111286 | 321*103 |
| 800838 | 322*103 |
| 800940 | 301*103 |
| 801002 | 309*103 |
| 800849 | 303*103 |
